# Supplementary material
Source: publisher figshare collection journal article supplement (https://adisjournals.figshare.com/ndownloader/files/34117959)
Supplement: Supplementary file 1 [file 34117959]

## Oritavancin (KIMYRSA™) : Adis Evaluation

### Clinical Considerations

- Has better diluent compatibility (0.9% sodium chloride injection and dextrose 5% in sterile water), full dose in a single vial, a shorter infusion time and a lower infusion volume than the original intravenous (IV) formulation
- Similar pharmacokinetic profile to that of the original IV formulation
- Generally well tolerated with no new safety signals

### Plain Language Summary

#### *Background and rationale*

- Acute bacterial skin and skin structure infections (ABSSSIs) are heterogeneous bacterial infections that can pose a significant burden on healthcare systems.
- In an attempt to optimize patient outcomes and healthcare utilizations, single-dose regimens have been developed as an alternative to multi-dose and multi-day regimens for ABSSSIs.
- Oritavancin is the first single-dose intravenous (IV) antibacterial therapy approved in the USA for the treatment of adult patients with ABSSSIs.
- With its well-established efficacy and safety profiles, a new IV formulation of oritavancin (KIMYRSA™) has been developed, which has a shorter infusion time and a smaller infusion volume than the originally approved IV formulation (ORBACTIV®).

#### *Clinical findings*

- The pharmacokinetic and safety profiles of oritavancin were similar between the two IV formulations.

#### *Conclusion*

The new IV formulation of oritavancin is a convenient, effective treatment option for patients with ABSSSIs.

This plain language summary represents the opinions of the author. For a full list of declarations, including funding and author disclosure statements, please see the full text online. © Springer Nature Switzerland AG 2022.
